# Supplementary material for: Breast cancer incidence and survival in Scotland by socio-economic deprivation and tumour subtype
Source: Breast Cancer Res Treat. Author manuscript; Available in PMC 2022 Jul 6. (PMC9239954; doi:10.1007/s10549-022-06632-1)
Supplement: Supplementary File [file EMS146363-supplement-Supplementary_File.xlsx]

## Sheet: Supp Table 1
Supplementary Table 1: Descriptive characteristics table for the cohort of women diagnosed with BC in Scotland from 2000 to 2016 by ER status and SIMD quintile.
		Most deprived	10946	18		2nd quintile	12304	20		3rd quintile	12840	20		4th quintile	13013	21		Least deprived	12909	21	62012
		Positive		Negative		Positive		Negative		Positive		Negative		Positive		Negative		Positive		Negative
		8356	81	1908	19	9616	83	1990	17	10200	84	1965	16	10218	83	2063	17	10394	85	1861	15
	Age
% by row	<50 years	1523	75	517	25	1729	76	532	24	1867	78	528	22	2004	78	552	22	2119	81	488	19
	50-69 years	4219	82	920	18	4761	83	944	17	5322	85	936	15	5412	84	1019	16	5468	86	915	14
	70 years or older	2614	85	471	15	3126	86	514	14	3011	86	501	14	2802	85	492	15	2807	86	458	14
	Scottish Region
	North	947	81	216	19	1882	81	434	19	3391	84	646	16	3715	81	871	19	2658	82	602	18
	South East	1423	83	288	17	2684	85	471	15	3110	86	519	14	3114	86	502	14	3679	88	519	12
	West	5986	81	1404	19	5050	82	1085	18	3699	82	800	18	3389	83	690	17	4057	85	740	15
	Year of diagnosis
	2000-2003	1649	79	431	21	1862	80	454	20	2004	81	470	19	2018	82	453	18	2121	83	423	17
	2004-2007	1856	81	433	19	2178	82	472	18	2352	84	445	16	2282	83	456	17	2235	86	368	14
	2008-2011	2100	82	455	18	2433	84	468	16	2525	85	442	15	2589	83	518	17	2590	85	470	15
	2012-2016	2751	82	589	18	3143	84	596	16	3319	85	608	15	3329	84	636	16	3448	85	600	15
% by column	Charlson Score Index
	0	7810	93	1769	93	9084	94	1883	95	9763	96	1880	96	9845	96	1974	96	10045	97	1814	97
	1 or more	546	7	139	7	532	6	107	5	437	4	85	4	373	4	89	4	349	3	47	3
% by column	Tumour grade
	I	1103	13	25	1	1418	15	29	1	1525	15	26	1	1571	15	33	2	1552	15	22	1
	II	3576	43	244	13	4403	46	269	14	5029	49	298	15	5067	50	328	16	5215	50	291	16
	III	2331	28	1362	71	2558	27	1454	73	2724	27	1442	73	2712	27	1491	72	2797	27	1361	72
	Unknown	1346	16	277	15	1237	13	238	12	922	9	199	10	868	8	211	10	830	8	187	10
	Tumour stage
	1	2850	34	439	23	3446	36	460	23	3787	37	524	27	3989	39	536	26	4097	39	504	27
	2	2966	36	789	41	3357	35	850	43	3635	36	789	40	3673	36	865	42	3679	35	790	42
	3	1151	14	335	18	1329	14	348	17	1384	14	382	19	1355	13	390	19	1332	13	301	16
	4	442	5	126	7	492	5	115	6	496	5	113	6	385	4	106	5	442	4	90	5
	Unknown	947	11	219	11	992	10	217	11	898	9	157	8	816	8	166	8	844	8	176	9
	Screen detected
	Yes	2346	28	279	15	2931	30	333	17	3324	33	333	17	3538	35	388	19	3506	34	351	19
	No	5831	70	1576	83	6590	69	1632	82	6770	66	1610	82	6595	64	1654	80	6781	65	1489	80
	Unknown	179	2	53	3	95	1	25	1	106	1	22	1	85	1	21	1	107	1	21	1
	PR status*
	Positive	3000	69	33	4	3064	62	44	5	3194	61	40	4	3306	62	55	5	3269	60	53	6
	Negative	569	13	780	83	606	12	759	80	601	11	728	77	608	11	811	80	643	12	717	76
	Unknown	767	18	123	13	1304	26	145	15	1464	28	173	18	1398	26	154	15	1543	28	169	18
	HER2 status*
	Positive	487	11	250	27	547	11	263	28	592	11	266	28	615	11	282	28	599	11	292	31
	Negative	3439	79	601	64	3976	80	607	64	4236	81	611	65	4224	80	654	64	4405	81	572	61
	Unknown	410	10	85	9	451	9	78	8	431	8	64	7	473	9	84	8	451	8	75	8
	Surgery
	Yes	6846	82	1701	89	8004	83	1774	89	8781	86	1782	91	8999	88	1870	91	9237	89	1712	92
	No	1462	18	196	11	1573	17	<250	11	1393	14	<200	9	1195	12	<200	9	1126	11	<200	8
	Unknown	48	0	11	0	39	0	<10	0	26	0	<10	0	24	0	<10	0	31	0	<10	0
	Radiotherapy
	Yes	4736	57	1114	58	5557	58	1217	61	6313	62	1266	65	6486	63	1309	64	6780	65	1233	66
	No	3163	38	672	36	3675	38	693	35	3611	35	635	32	3470	34	683	33	3292	32	564	30
	Unknown	457	5	122	6	384	4	80	4	276	3	64	3	262	3	71	3	322	3	64	4
	Chemotherapy
	Yes	2619	31	1286	67	2982	31	1364	69	3245	32	1374	70	3242	32	1424	69	3580	34	1330	72
	No	5480	66	580	31	6439	67	602	30	6789	67	563	29	6817	66	616	30	6660	64	510	27
	Unknown	257	3	42	2	195	2	24	1	166	2	28	1	159	2	23	1	154	2	21	1
	Hormone therapy
	Yes	7143	86	130	7	8348	87	148	7	8925	87	138	7	8907	87	166	8	9050	87	134	7
	No	600	7	1681	88	758	8	1780	90	765	7	1761	90	831	8	1828	89	810	8	1663	89
	Unknown	613	7	97	5	510	5	62	3	510	5	66	3	480	5	69	3	534	5	64	4
	Vital status
	Alive	5421	65	1091	57	6483	67	1151	58	7241	71	1179	60	7584	74	1341	65	7888	76	1267	68
	Dead	2935	35	817	43	3133	33	839	42	2959	29	786	40	2634	26	722	35	2506	24	594	32
Amongst those who died during the follow-up	Breast cancer death
	Yes	1872	64	661	81	1991	64	654	78	1887	64	635	81	1703	65	588	81	1646	66	487	82
	No	1063	36	156	19	1142	36	185	22	1072	36	151	19	931	35	134	19	860	34	107	18
	Follow-up time in years for those who died from BC
	Mean (SD)	6.6	4.6	5.9	4.9	6.8	4.6	6.1	4.8	7	4.7	6.3	4.9	7.3	4.7	6.5	5	7.4	4.7	6.7	4.9
		Frequency	%			Frequency	%			Frequency	%			Frequency	%			Frequency	%
Total with ER recorded by quintile		10264	93.7694			11606	94.327			12165	94.743			12281	94.3749			12255	94.9338
Missing ER by quintile		682	6.23059			698	5.67295			675	5.25701			732	5.62514			654	5.06623

## Sheet: Supp Figure 1
Supplementary Figure 1: Kaplan Meier curve by SIMD quintile for cohort of BC women diagnosed from 2000 to 2016.

## Sheet: Supp Table 2
Supplementary Table 2: Results from Cox proportional hazard models for the risk of BC death by SIMD quintile and stratified by ER status and IHC-defined molecular subtype
Model is adjusted for age, incidence year, NHS region, tumour characteristics (TNM stage and method of detection, treatments (surgery, radiotherapy, chemotherapy and hormone therapy) and Charlson comorbidity index. Models carried out on complete cases separately by subtype with n=37667 (no deaths=5194) for ER+, n=7598 (no deaths=2073) for ER-, n=12762 (no deaths=604) for luminal A, n=6984 (no dea…
		Molecular subtype
		ER+	ER-	Luminal A	Luminal B	HER2-enriched	TNBC
SIMD quintile	Most deprived	1.29 [1.18, 1.41]	1.27 [1.09, 1.47]	1.46 [1.13,1.88]	1.20 [0.95, 1.52]	2.1 [1.23, 3.59]	1.12 [0.84, 1.49]
	2	1.21 [1.09, 1.33]	1.24 [1.08, 1.40]	1.32 [0.99, 1.65]	1.11 [0.86, 1.36]	1.39 [0.41, 2.37]	1.23 [0.94, 1.52]
	3	1.12 [1.00, 1.24]	1.17 [1.01,1.33]	0.96 [0.63, 1.29]	1.10 [0.85, 1.35]	1.34 [0.36, 2.32]	1.29 [0.99, 1.58]
	4	1.05 [0.95, 1.15]	1.01 [0.87, 1.15]	0.98 [0.65, 1.31]	0.97 [0.72, 1.22]	1.21 [0.23, 2.19]	1.00 [0.71, 1.29]
	Least derpived	Reference	Reference	Reference	Reference	Reference	Reference
